# Supplementary material for: Charge transfer doping in functionalized silicon nanosheets/P3HT hybrid material for applications in electrolyte-gated field-effect transistors
Source: Royal Society of Chemistry journal article supplement (doi:10.1039/c8tc01484a), 2018-01-01
Supplement: c8tc01484a1.pdf [file c8tc01484a1.pdf]

## Supporting Information

### Charge Transfer Doping in Functionalized Silicon Nanosheets/P3HT Hybrid Material for Applications in Electrolyte-Gated Field-Effect Transistors

Alina Lyuleeva<sup>†\*a</sup>, Philipp Holzmüller<sup>†b</sup>, Tobias Helbich<sup>b</sup>, Martin Stutzmann<sup>c</sup>, Martin S. Brandt<sup>c</sup>, Markus Becherer<sup>a</sup>, Paolo Lugli<sup>d</sup>, Bernhard Rieger<sup>\*b</sup>

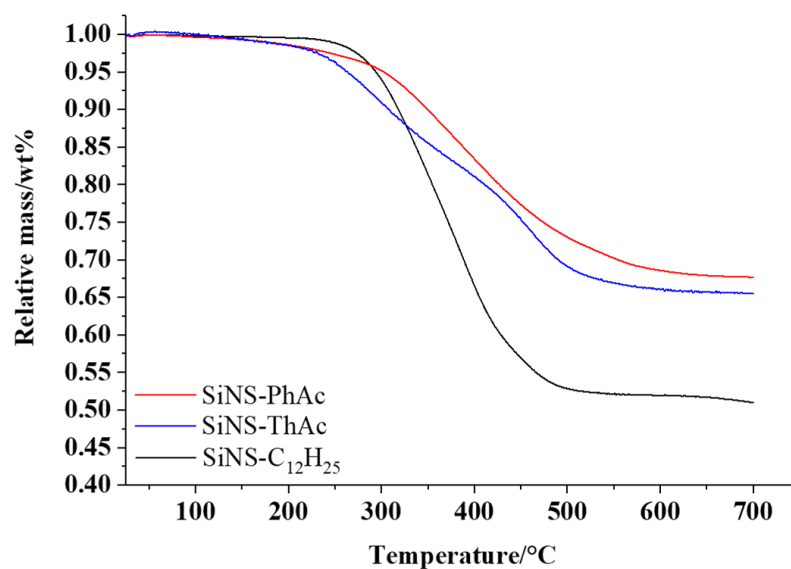

**Figure S1.** TGA measurements of SiNS-C<sub>12</sub>H<sub>25</sub>, SiNS-PhAc and SiNS-ThAc.

**Table S1.** Comparison of the TGA results of SiNS-C<sub>12</sub>H<sub>25</sub>, SiNS-PhAc and SiNS-ThAc.

| Substrate                  | Molecular weight <sup>a</sup> | wt% loss | wt% loss/molecular weight |
|----------------------------|-------------------------------|----------|---------------------------|
| 1-Dodecene                 | 169.2                         | 47       | 2.78                      |
| Phenylacetylene            | 103.0                         | 30       | 2.91                      |
| 2-Ethynyl-3-hexylthiophene | 91.0                          | 33       | 1.71                      |

<sup>a</sup> Molecular weight is in this case defined as the molecule weight of the organic molecule attached to the surface.

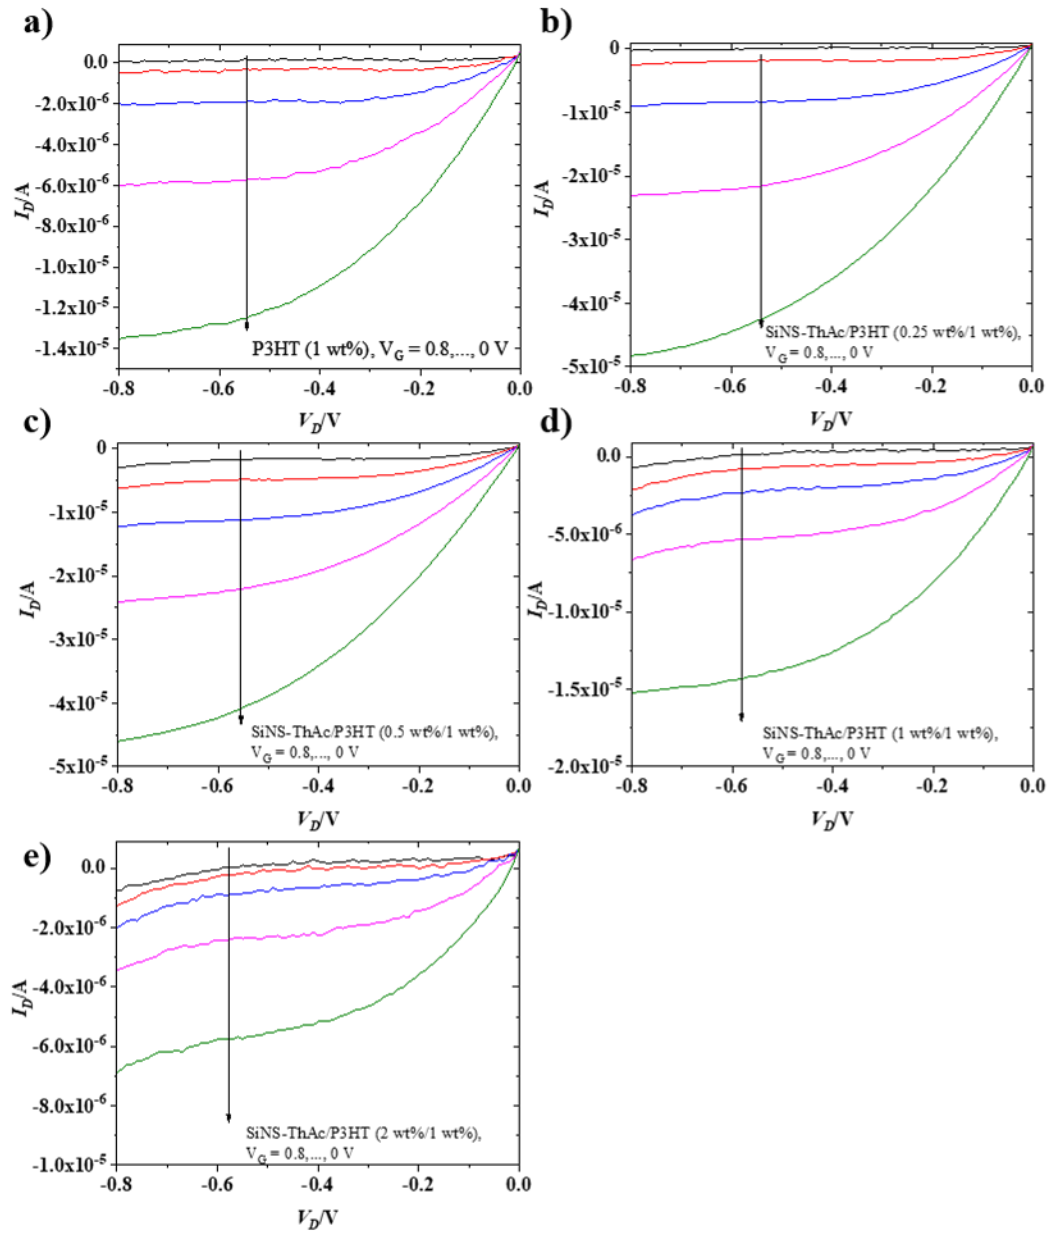

**Figure S2.** Output characteristics with different gate voltages (0.2 V steps from 0.8 V to 0.0 V) of a) P3HT (1 wt%), b) SiNS-ThAc/P3HT (0.25 wt%/1 wt%), c) SiNS-ThAc/P3HT (0.5 wt%/1 wt%), d) SiNS-ThAc/P3HT (1 wt%/1 wt%), SiNS-ThAc/P3HT (2 wt%/1 wt%).

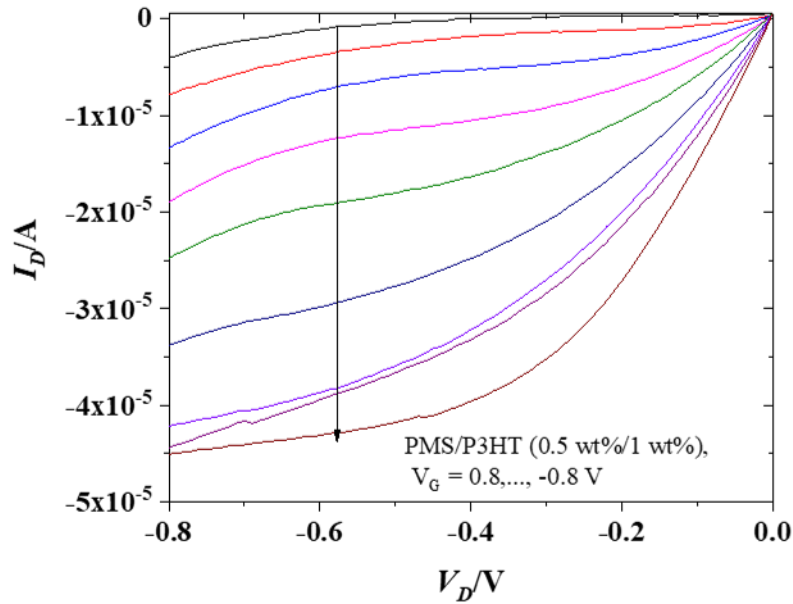

**Figure S3.** Output curve of PMS/P3HT and its deformed shape in the positive voltage range.

**Table S2.**  $I_{ON}/I_{OFF}$  ratios calculated from the highest ( $I_{ON}$ ) and lowest ( $I_{OFF}$ ) currents of the operating device, transconductance ( $g_m$ ) calculated from the slope of the linear fit in the linear regime of the transfer curves, threshold voltage ( $V_{Th}$ ) as the x-axis, mobility ( $\mu_0$ ), film root mean square roughness (rough.) and film thickness (thick.) for different hybrid films (varied Si-based materials). The formula used for the mobility is:  $\mu_0 = g_m/(W/L \cdot V_D \cdot C_G)$ ;  $W/L = 900$ ;  $V_D = -0.1$  V;  $C_G = 7.8 \cdot 10^{-6}$  cm<sup>2</sup>F.

| Substance<br>(wt%/wt%)                                | $I_{ON}/I_{OFF}$  | $g_m$ (S)            | $V_{Th}$ (V)         | $\mu_0$ (cm <sup>2</sup><br>V <sup>-1</sup> s <sup>-1</sup> ) | Film<br>roughness<br>(nm) | Film<br>thickness $\pm$<br>10 nm (nm) |
|-------------------------------------------------------|-------------------|----------------------|----------------------|---------------------------------------------------------------|---------------------------|---------------------------------------|
| P3HT                                                  | $9.97 \cdot 10^6$ | $2.30 \cdot 10^{-5}$ | -0.37                | $3.3 \cdot 10^{-2}$                                           | 2.34                      | 56                                    |
| PPS/P3HT (0.5/1)                                      | $2.21 \cdot 10^7$ | $3.41 \cdot 10^{-5}$ | -0.12                | $4.9 \cdot 10^{-2}$                                           | 3.01                      | 30                                    |
| PMS/P3HT (0.5/1)                                      | $2.77 \cdot 10^7$ | $3.48 \cdot 10^{-5}$ | -                    | $5.0 \cdot 10^{-2}$                                           | 0.97                      | 32                                    |
|                                                       |                   |                      | $9.37 \cdot 10^{-7}$ |                                                               |                           |                                       |
| SiNC-C <sub>12</sub> H <sub>25</sub> /P3HT<br>(0.5/1) | -                 | -                    | -                    | -                                                             | 3.96                      | 68                                    |
| SiNS-ThAc/P3HT<br>(0.5/1)                             | $3.35 \cdot 10^7$ | $4.96 \cdot 10^{-5}$ | -0.07                | $7.1 \cdot 10^{-2}$                                           | 1.85                      | 30                                    |

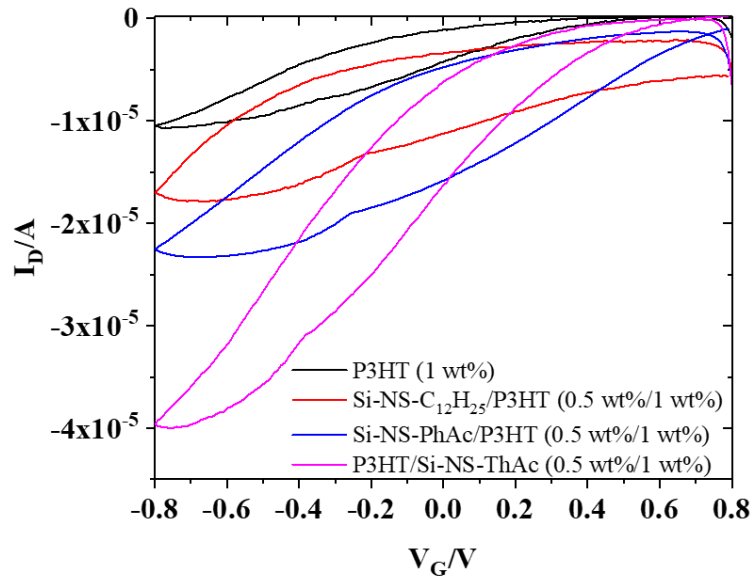

**Figure S4.** Transfer characteristics with hysteresis (drain voltage,  $V_D = -0.1$  V) of P3HT (1 wt%), SiNS- $C_{12}H_{25}$ /P3HT (0.5 wt%/1 wt%), SiNS-PhAc/P3HT (0.5 wt%/1 wt%) and SiNS-ThAc/P3HT (0.5 wt%/1 wt%)-based EGFETs.

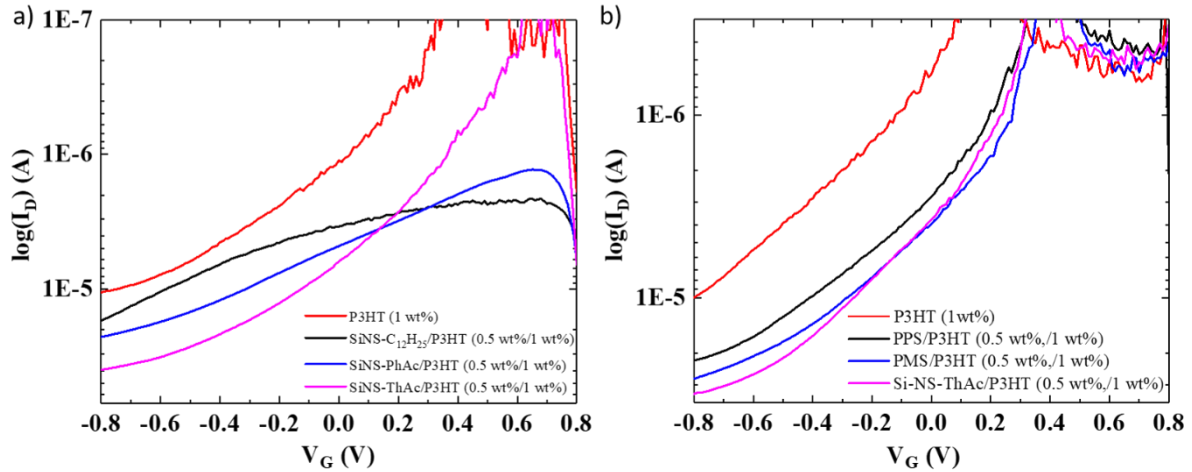

**Figure S5.** a) b) Transfer characteristics with log-plot (drain voltage,  $V_D = -0.1$  V) of P3HT (1 wt%), SiNS- $C_{12}H_{25}$ /P3HT (0.5 wt%/1 wt%), SiNS-PhAc/P3HT (0.5 wt%/1 wt%) and SiNS-ThAc/P3HT (0.5 wt%/1 wt%)-based EGFETs. b) Transfer characteristics with log-plot (drain voltage,  $V_D = -0.1$  V) of P3HT (1 wt%), PPS/P3HT (0.5 wt%/1 wt%), PMS/P3HT (0.5 wt%/1 wt%) and SiNS-ThAc/P3HT (0.5 wt%/1 wt%)-based EGFETs

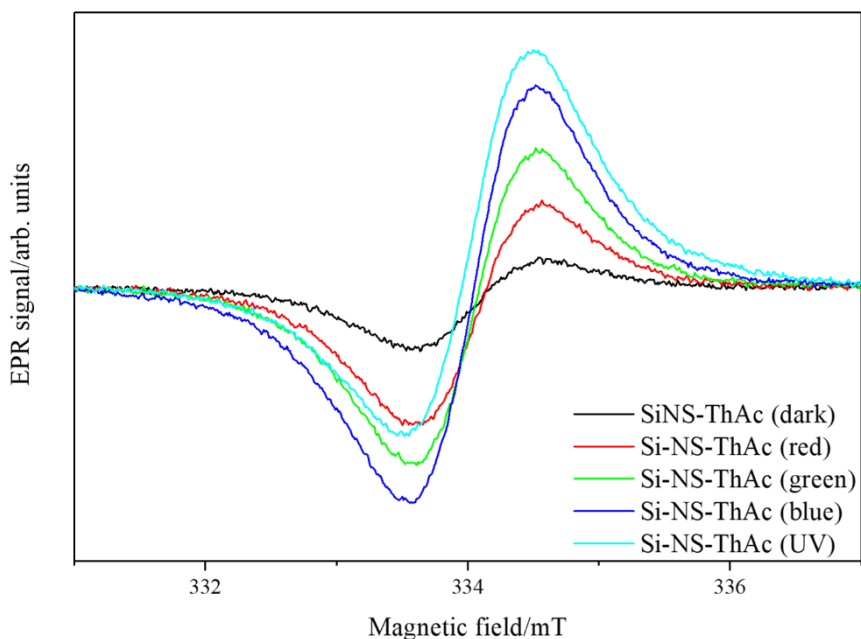

**Figure S6:** LEPR measurements of SiNS-ThAc at 4 K. The obtained data are calibrated to the same signal range. Red (623 nm), green (525 nm), blue (470 nm) and UV light (390 nm) light sources were used for excitation.

**Table S3:** Thin-film roughness and thickness of the blends presented in Figure 3.

| Substance<br>(wt%/wt%)                                | Film root mean square<br>(r.m.s.) roughness (nm) | Film thickness $\pm$ 10 nm<br>(nm) |
|-------------------------------------------------------|--------------------------------------------------|------------------------------------|
| P3HT                                                  | 2.34                                             | 56                                 |
| SiNS-C <sub>12</sub> H <sub>25</sub> /P3HT<br>(0.5/1) | 1.17                                             | 26                                 |
| SiNS-PhAc/P3HT<br>(0.5/1)                             | 0.84                                             | 34                                 |
| SiNS-ThAc/P3HT<br>(0.5/1)                             | 1.85                                             | 30                                 |

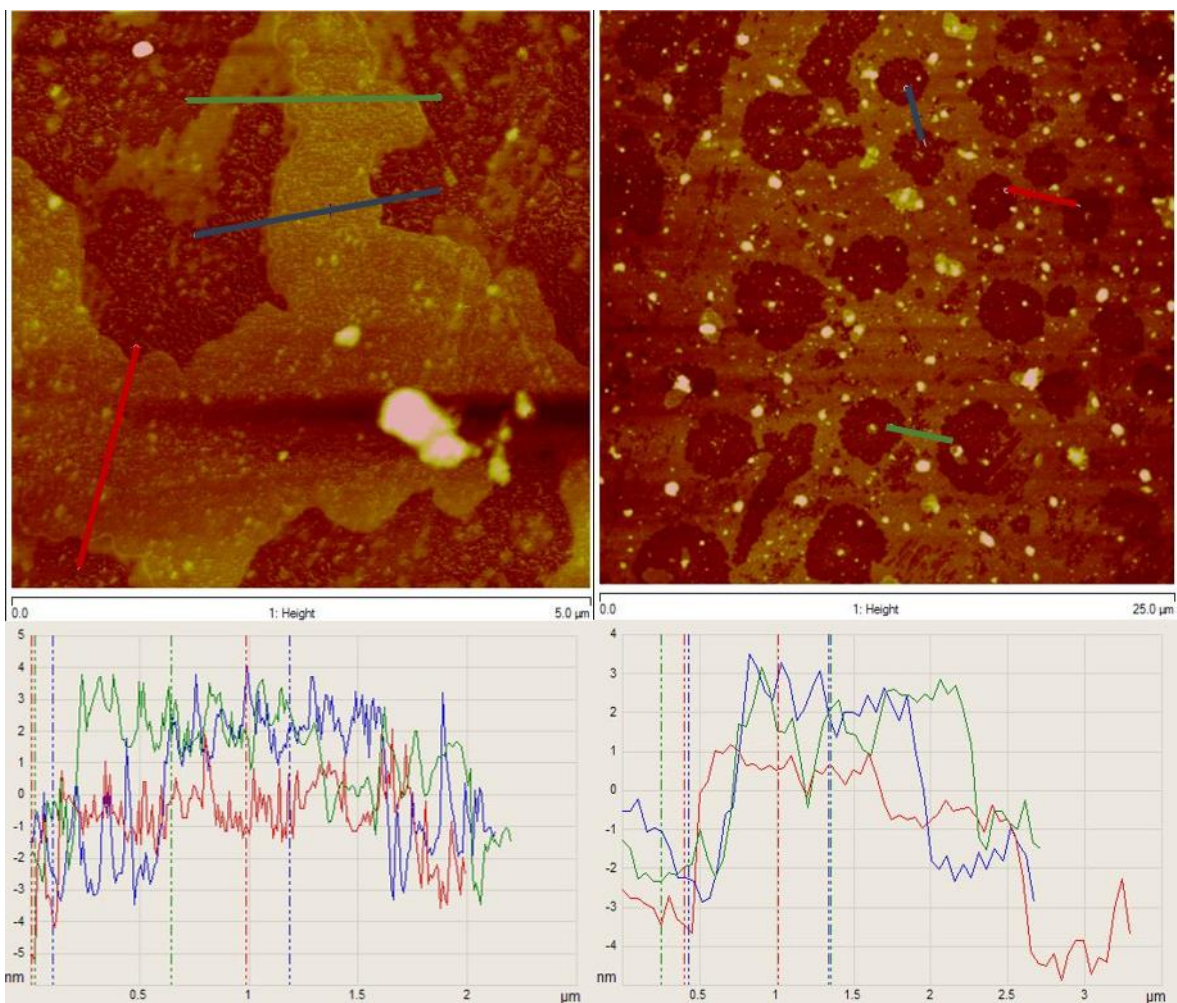

**Figure S6:** AFM Tapping Mode images of single SiNS-C<sub>12</sub>H<sub>25</sub> sheets with 5 μm<sup>2</sup> (left) and 25 μm<sup>2</sup> (right) scales. The corresponding height profiles along the lines are shown in the graphs under the AFM images, respectively. Brighter spots represent partially several layers of SiNSs.

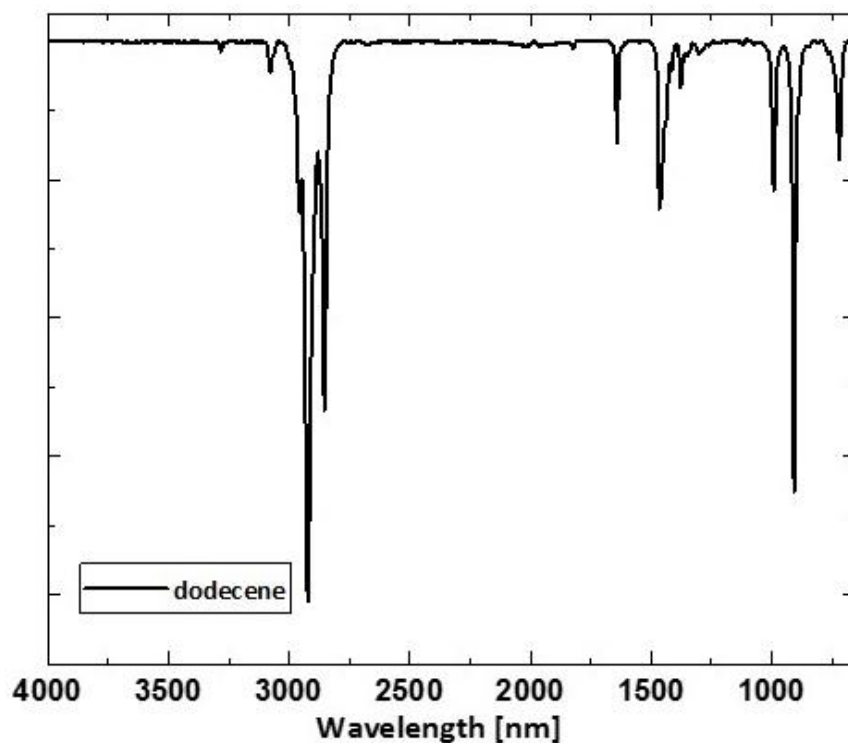

**Figure S7:** FTIR spectrum of dodecene monomer, which was used for the modification of SiNSs' surface and with it for the synthesis of SiNS-C<sub>12</sub>H<sub>25</sub>.

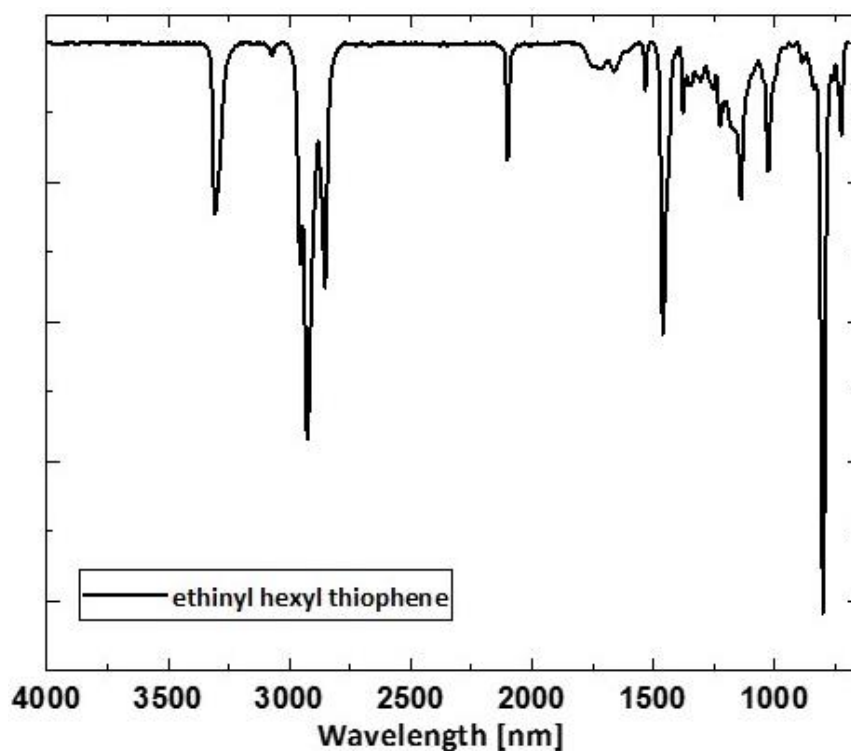

**Figure S8:** FTIR spectrum of ethyl hexyl thiophene monomer, which was used for the modification of SiNSs' surface.

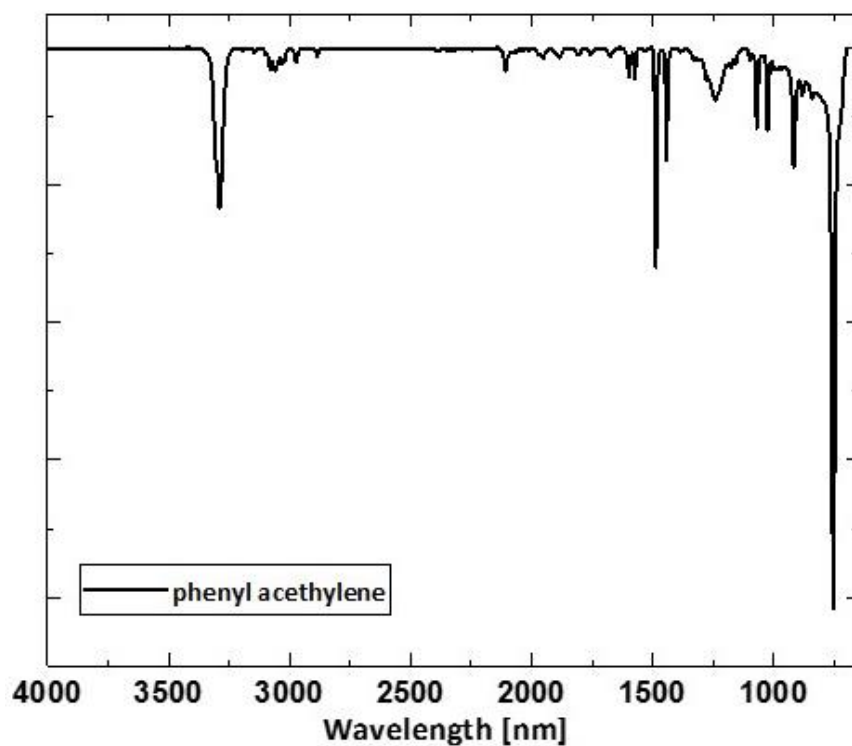

**Figure S9:** FTIR spectrum of phenyl acetylene monomer, which was used for the modification of SiNSs' surface.
